# Supplementary material for: Analysis of the peroxisome proliferator-activated receptor-β/δ (PPARβ/δ) cistrome reveals novel co-regulatory role of ATF4
Source: PubMed Central journal article supplement (PMC3556323; doi:10.1186/1471-2164-13-665), 2012-11-24
Supplement: 1471-2164-13-665-S2.pdf [file 1471-2164-13-665-S2.pdf]

Supplemental Table  
3; Khozoie et al  
203 Direct PPARb/d  
target genes, sorted  
by response type

| RefSeq_ID    | Gene_Symbol | type |
|--------------|-------------|------|
| NR_003522    | Abhd1       | 1    |
| NM_021604    | Agrn        | 1    |
| BC137640     | Al464131    | 1    |
| NM_013472    | Anxa6       | 1    |
| NM_007486    | Arhgdib     | 1    |
| NM_001112744 | Arhgef16    | 1    |
| NM_029847    | Arsk        | 1    |
| NM_213616    | Atp2b4      | 1    |
| NM_026514    | Cdc42ep3    | 1    |
| NM_172911    | D8Ert82e    | 1    |
| NM_001037999 | Dbi         | 1    |
| NM_144804    | Depdc7      | 1    |
| NM_027903    | Dhdh        | 1    |
| NM_001024474 | Diras2      | 1    |
| NM_013813    | Epb4.1l3    | 1    |
| NM_019699    | Fads2       | 1    |
| NM_029679    | Fam65b      | 1    |
| NM_001077361 | Fhl1        | 1    |
| NM_008238    | Foxn1       | 1    |
| NR_027137    | Gm10565     | 1    |
| NM_178406    | Gpr153      | 1    |
| NM_010340    | Gpr50       | 1    |
| NM_013546    | Hebp1       | 1    |
| NM_178020    | Hyal3       | 1    |
| NM_010493    | Icam1       | 1    |
| NM_053095    | Il24        | 1    |
| NM_008430    | Kcnk1       | 1    |
| NM_001039472 | Kif21b      | 1    |
| NM_001033131 | Krtdap      | 1    |
| NM_021295    | Lancl1      | 1    |
| NM_001159649 | Lax1        | 1    |
| NM_017372    | Lyz2        | 1    |
| NM_008594    | Mfge8       | 1    |
| NM_022879    | Myl7        | 1    |
| NM_173437    | Nav1        | 1    |
| NM_033525    | Npnt        | 1    |
| NM_008737    | Nrp1        | 1    |
| NM_001002927 | Penk        | 1    |
| NM_009538    | Plagl1      | 1    |
| NM_011122    | Plod1       | 1    |
| NM_011125    | Pltp        | 1    |
| NM_011101    | Prkca       | 1    |
| NM_001083119 | Ptpru       | 1    |
| NM_027455    | Qpct        | 1    |

## Sheet1

|              |               |   |
|--------------|---------------|---|
| NM_001161822 | Rgs17         | 1 |
| NM_153457    | Rtn1          | 1 |
| NM_011894    | Sh3bp5        | 1 |
| NM_173388    | Slc43a2       | 1 |
| NM_018760    | Slc4a4        | 1 |
| NM_011565    | Tead2         | 1 |
| NM_023476    | Tinagl1       | 1 |
| NM_021502    | Trappc2l      | 1 |
| NM_011657    | Tulp3         | 1 |
| NM_178924    | Upk1b         | 1 |
| NM_145940    | Wipi1         | 1 |
| NM_013705    | Zfp30         | 1 |
| NM_178384    | Zfp74         | 1 |
| NM_028820    | 1700017B05Rik | 2 |
| BC117777     | 2310002J15Rik | 2 |
| BC141220     | 2310014L17Rik | 2 |
| BC147211     | 4931406H21Rik | 2 |
| NM_001110271 | Abhd14a       | 2 |
| NM_029631    | Abhd14b       | 2 |
| NM_175643    | Adamts2       | 2 |
| NM_182928    | Adm2          | 2 |
| NM_007413    | Adora2b       | 2 |
| NM_009636    | Aebp1         | 2 |
| NM_011786    | Aloxe3        | 2 |
| NM_172309    | Arntl2        | 2 |
| NM_027435    | Atad2         | 2 |
| BC076634     | BC049807      | 2 |
| NM_178309    | Brip1         | 2 |
| NM_009783    | Cacna1g       | 2 |
| NM_001008706 | Calm5         | 2 |
| NM_013742    | Cars          | 2 |
| NM_007631    | Ccnd1         | 2 |
| NM_011925    | Cd97          | 2 |
| NM_178347    | Cdc23         | 2 |
| NM_001039185 | Ceacam1       | 2 |
| NM_026770    | Cgref1        | 2 |
| NM_026929    | Chac1         | 2 |
| NM_001081114 | Clip3         | 2 |
| NM_007742    | Col1a1        | 2 |
| NM_146007    | Col6a2        | 2 |
| NM_013496    | Crabp1        | 2 |
| NM_024223    | Crip2         | 2 |
| NM_007792    | Csrp2         | 2 |
| NM_009999    | Cyp2b10       | 2 |
| NM_007837    | Ddit3         | 2 |
| NM_177372    | Dna2          | 2 |
| NM_025718    | Dnase1l2      | 2 |
| NM_001013368 | E2f8          | 2 |
| NM_007949    | Ercc2         | 2 |
| NM_183221    | Fat4          | 2 |

## Sheet1

|              |          |   |
|--------------|----------|---|
| NM_011812    | Fbln5    | 2 |
| NM_026637    | Ggct     | 2 |
| NM_054044    | Gpr124   | 2 |
| NM_010345    | Grb10    | 2 |
| NM_022331    | Herpud1  | 2 |
| NM_001146049 | Htati2   | 2 |
| NM_172812    | Htr2a    | 2 |
| NM_016849    | Irf3     | 2 |
| NM_176922    | Itga11   | 2 |
| NM_010585    | Itpr1    | 2 |
| NM_001122733 | Kit      | 2 |
| NM_028973    | Lrrc15   | 2 |
| NM_028977    | Lrrc17   | 2 |
| NM_019391    | Lsp1     | 2 |
| NM_008555    | Masp1    | 2 |
| NM_023061    | Mcam     | 2 |
| NM_008627    | Meis3    | 2 |
| NM_008546    | Mfap2    | 2 |
| NM_145447    | Mfsd7c   | 2 |
| NM_011985    | Mmp23    | 2 |
| NM_177822    | Msln1    | 2 |
| NM_001005863 | Mtus1    | 2 |
| NM_008726    | Nppb     | 2 |
| NM_026004    | Nt5c3    | 2 |
| NM_133859    | Olfml3   | 2 |
| NM_028994    | Pck2     | 2 |
| NM_008788    | Pcolce   | 2 |
| NM_011058    | Pdgfra   | 2 |
| NM_008892    | Pola1    | 2 |
| NM_011131    | Pold1    | 2 |
| NM_152894    | Pop1     | 2 |
| NM_015784    | Postn    | 2 |
| NM_011145    | Ppard    | 2 |
| NM_001013381 | Rsad1    | 2 |
| NM_145535    | Sdcbp2   | 2 |
| NM_025848    | Sdhd     | 2 |
| NM_177243    | Slc26a9  | 2 |
| NM_022317    | Slc28a3  | 2 |
| NM_022880    | Slc29a1  | 2 |
| NM_145977    | Slc45a3  | 2 |
| NM_022814    | Svep1    | 2 |
| NM_023755    | Tcfcp2l1 | 2 |
| NM_011581    | Thbs2    | 2 |
| NM_009382    | Thy1     | 2 |
| NM_001081242 | Tln2     | 2 |
| NM_001013373 | Tmprss13 | 2 |
| NM_009400    | Tnfrsf18 | 2 |
| NM_175093    | Trib3    | 2 |
| NM_027182    | Trip13   | 2 |
| NM_199033    | Tsen2    | 2 |

## Sheet1

|              |               |   |
|--------------|---------------|---|
| NM_001040695 | Uevld         | 2 |
| NM_029770    | Unc5b         | 2 |
| NM_012038    | Vsnl1         | 2 |
| NM_178691    | Yod1          | 2 |
| NM_022409    | Zfp296        | 2 |
| NM_145484    | Zfp758        | 2 |
| BC027185     | 2210023G05Rik | 3 |
| NM_025341    | Abhd6         | 3 |
| NM_009626    | Adh7          | 3 |
| NM_019993    | Aldh9a1       | 3 |
| NM_009747    | Bdkrb2        | 3 |
| NM_172759    | Ces5          | 3 |
| NM_130450    | Elovl6        | 3 |
| NM_026695    | Etfb          | 3 |
| NM_053090    | Fam126a       | 3 |
| NM_010234    | Fos           | 3 |
| NM_008046    | Fst           | 3 |
| NM_178878    | Hadha         | 3 |
| NM_145558    | Hadhb         | 3 |
| NM_008256    | Hmgcs2        | 3 |
| NM_010476    | Hsd17b7       | 3 |
| NM_024255    | Hsdl2         | 3 |
| NM_001031772 | Lin28b        | 3 |
| NM_013609    | Ngf           | 3 |
| NM_027950    | Osgin1        | 3 |
| NM_016966    | Phgdh         | 3 |
| NM_009434    | Phlda2        | 3 |
| NM_008869    | Pla2g4a       | 3 |
| NM_007408    | Plin2         | 3 |
| NM_001033217 | Prickle1      | 3 |
| NM_025436    | Sc4mol        | 3 |
| NM_015756    | Shroom3       | 3 |
| NM_001102414 | Slc2a9        | 3 |
| NM_145533    | Smox          | 3 |
| NM_013914    | Snai3         | 3 |
| NM_207708    | Syng1         | 3 |
| NM_172383    | Tmem125       | 3 |
| NM_172411    | 2310007B03Rik | 4 |
| NM_026674    | Aph1c         | 4 |
| NM_178415    | Bbs9          | 4 |
| NM_144855    | Cbs           | 4 |
| NM_178704    | Dpy19l3       | 4 |
| NM_153782    | Fam20a        | 4 |
| NM_001081175 | Itpkb         | 4 |
| NM_198108    | Morn4         | 4 |
| NM_024188    | Oxct1         | 4 |
| NM_008885    | Pmp22         | 4 |
| NM_009369    | Tgfb1         | 4 |
| NM_025416    | Them5         | 4 |
| NM_053178    | Acsbg1        | 5 |

Sheet1

|           |         |   |
|-----------|---------|---|
| NM_020581 | Angptl4 | 5 |
| NM_008009 | Fgfbp1  | 5 |
| NM_145130 | Lpcat3  | 5 |
| NM_020622 | Fam3b   | 6 |
| NM_010401 | Hal     | 6 |
| NM_133357 | Krt75   | 6 |
| NM_027406 | Aldh1l1 | 8 |
| NM_146017 | Gabrp   | 8 |
| NM_172671 | Lgr4    | 8 |
