# Supplementary material for: Analysis of the peroxisome proliferator-activated receptor-β/δ (PPARβ/δ) cistrome reveals novel co-regulatory role of ATF4
Source: PubMed Central journal article supplement (PMC3556323; doi:10.1186/1471-2164-13-665), 2012-11-24
Supplement: 1471-2164-13-665-S3.pdf [file 1471-2164-13-665-S3.pdf]

Sheet1

Supplemental  
 Table 4; Khozoie  
 et al  
 130 modulated  
 by ligand  
 activation of  
 PPARb/d in  
 mouse  
 keratinocytes

| RefSeq_ID    | Gene_Symbol | type |
|--------------|-------------|------|
| NM_010827    | Msc         | 3    |
| NM_009949    | Cpt2        | 3    |
| NM_001081206 | Dgki        | 3    |
| NM_053090    | Fam126a     | 3    |
| NM_007981    | Acsl1       | 3    |
| NM_010234    | Fos         | 3    |
| NM_009434    | Phlda2      | 3    |
| NM_001033217 | Prickle1    | 3    |
| NM_011198    | Ptgs2       | 3    |
| NM_013914    | Snai3       | 3    |
| NM_019993    | Aldh9a1     | 3    |
| NM_027950    | Osgin1      | 3    |
| NM_008869    | Pla2g4a     | 3    |
| NM_010476    | Hsd17b7     | 3    |
| NM_146006    | Lss         | 3    |
| NM_001031772 | Lin28b      | 3    |
| NM_177368    | Tmtc2       | 3    |
| NM_017366    | Acadvl      | 3    |
| NM_025638    | Gdpd1       | 3    |
| NM_012006    | Acot1       | 3    |
| NM_009747    | Bdkrb2      | 3    |
| NM_053155    | Clmn        | 3    |
| NM_011868    | Peci        | 3    |
| NM_008046    | Fst         | 3    |
| NM_025341    | Abhd6       | 3    |
| NM_177814    | Erc2        | 3    |
| NM_008125    | Gjb2        | 3    |
| NM_207708    | Syng1       | 3    |
| NM_018790    | Arc         | 3    |
| NM_011638    | Tfrc        | 3    |
| NM_053261    | Impa2       | 3    |
| NM_177470    | Acaa2       | 3    |
| NM_010235    | Fosl1       | 3    |
| XR_034011    | Gm5246      | 3    |
| NM_138595    | Gldc        | 3    |
| NM_145533    | Smox        | 3    |
| NM_001024145 | Pla2g4f     | 3    |
| NM_008256    | Hmgcs2      | 3    |
| NM_013609    | Ngf         | 3    |

Sheet1

|              |               |   |
|--------------|---------------|---|
| NM_009196    | Slc16a1       | 3 |
| NM_130450    | Elov16        | 3 |
| NM_009626    | Adh7          | 3 |
| NM_025794    | Etfdh         | 3 |
| NM_016966    | Phgdh         | 3 |
| NM_029522    | Gpsm2         | 3 |
| NM_172687    | Coq3          | 3 |
| NM_080289    | Grhpr         | 3 |
| NM_024255    | Hsd12         | 3 |
| NM_026172    | Decr1         | 3 |
| NM_007408    | Plin2         | 3 |
| NM_172383    | Tmem125       | 3 |
| NM_153526    | Insig1        | 3 |
| NM_145558    | Hadhb         | 3 |
| NM_015756    | Shroom3       | 3 |
| NM_178878    | Hadha         | 3 |
| NM_001102414 | Slc2a9        | 3 |
| NM_145839    | Rasgef1b      | 3 |
| NM_023516    | 2310016C08Rik | 3 |
| NM_009908    | Cmas          | 3 |
| NM_013743    | Pdk4          | 3 |
| NM_026695    | Etfb          | 3 |
| NM_011671    | Ucp2          | 3 |
| NM_009627    | Adm           | 3 |
| NM_001130479 | Nucb2         | 3 |
| NM_172759    | Ces5          | 3 |
| BC027185     | 2210023G05Rik | 3 |
| NM_026931    | 1810011O10Rik | 3 |
| NM_025436    | Sc4mol        | 3 |
| NM_008317    | Hyal1         | 3 |
| NM_019750    | Nat6          | 3 |
| NM_178753    | Spin4         | 3 |
| NM_198108    | Morn4         | 4 |
| NM_201644    | Ugt1a9        | 4 |
| NM_009369    | Tgfb1         | 4 |
| NM_001081175 | Itpkb         | 4 |
| NM_016917    | Slc40a1       | 4 |
| NM_172411    | 2310007B03Rik | 4 |
| NM_146240    | Rassf9        | 4 |
| NM_027890    | Susd2         | 4 |
| NM_173733    | Suox          | 4 |
| NM_008885    | Pmp22         | 4 |
| NM_001005341 | Ypel2         | 4 |
| NM_153782    | Fam20a        | 4 |
| NM_024188    | Oxct1         | 4 |
| NM_029436    | Klhl24        | 4 |
| NM_144855    | Cbs           | 4 |
| BC096371     | D18Ert653e    | 4 |
| NM_001033280 | Gm94          | 4 |
| BC120879     | 4833423E24Rik | 4 |

Sheet1

|              |               |   |
|--------------|---------------|---|
| NM_025416    | Them5         | 4 |
| NM_178786    | Skint4        | 4 |
| NM_011402    | Slc34a2       | 4 |
| NM_025826    | Acadsb        | 4 |
| NM_178704    | Dpy19l3       | 4 |
| NM_027998    | Cldn23        | 4 |
| NM_001025577 | Maf           | 4 |
| NM_178415    | Bbs9          | 4 |
| NM_026674    | Aph1c         | 4 |
| NM_016913    | Porcn         | 4 |
| NM_020581    | Angptl4       | 5 |
| NM_053178    | Acsbg1        | 5 |
| NM_028817    | Acsl3         | 5 |
| NM_011704    | Vnn1          | 5 |
| NM_009760    | Bnip3         | 5 |
| NM_027906    | 1300010F03Rik | 5 |
| NM_013495    | Cpt1a         | 5 |
| NM_009127    | Scd1          | 5 |
| NM_008009    | Fgfbp1        | 5 |
| NM_145130    | Lpcat3        | 5 |
| NM_001004153 | AU018091      | 5 |
| NM_020520    | Slc25a20      | 5 |
| NM_027884    | Tns1          | 6 |
| NM_007695    | Chi3l1        | 6 |
| NM_010401    | Hal           | 6 |
| NM_027997    | Serpina9      | 6 |
| NM_133357    | Krt75         | 6 |
| NM_020622    | Fam3b         | 6 |
| NM_001039042 | Klk13         | 6 |
| NM_001145960 | Slc37a2       | 6 |
| NM_011139    | Pou2f3        | 6 |
| NM_011333    | Ccl2          | 7 |
| NM_027406    | Aldh1l1       | 8 |
| NM_146017    | Gabrp         | 8 |
| NM_011430    | Sncg          | 8 |
| NM_009155    | Sepp1         | 8 |
| NM_172671    | Lgr4          | 8 |
| NM_025285    | Stmn2         | 8 |
| NM_030601    | Ctca2         | 8 |
| NM_172752    | Sorbs2        | 8 |
| NM_017369    | Gabre         | 8 |
