# Supplementary material for: Analysis of the peroxisome proliferator-activated receptor-β/δ (PPARβ/δ) cistrome reveals novel co-regulatory role of ATF4
Source: PubMed Central journal article supplement (PMC3556323; doi:10.1186/1471-2164-13-665), 2012-11-24
Supplement: 1471-2164-13-665-S4.pdf [file 1471-2164-13-665-S4.pdf]

Sheet1

Supplemental  
Table 5: Khozoie  
et al

103 PPARb/d-  
dependent genes  
common between  
Khozoie et al and  
Adhikary et al

| RefSeq_ID    | Gene_Symbol   | type | Adhikary et al Type | Human_Gene | humanEntrez | mouseEntrez |
|--------------|---------------|------|---------------------|------------|-------------|-------------|
| NM_147219    | Abca5         | 1    | 2                   | ABCA5      | 23461       | 217265      |
| NM_021604    | Agrn          | 1    | 2                   | AGRN       | 375790      | 11603       |
| NM_013472    | Anxa6         | 1    | 1                   | ANXA6      | 309         | 11749       |
| NM_007486    | Arhgdib       | 1    | 1                   | ARHGDIB    | 397         | 11857       |
| NM_213616    | Atp2b4        | 1    | 1                   | ATP2B4     | 493         | 381290      |
| NM_013867    | Bcar3         | 1    | 1                   | BCAR3      | 8412        | 29815       |
| NM_007670    | Cdkn2b        | 1    | 1                   | CDKN2B     | 1030        | 12579       |
| NM_007739    | Col8a1        | 1    | 7                   | COL8A1     | 1295        | 12837       |
| NM_146015    | Efemp1        | 1    | 2                   | EFEMP1     | 2202        | 216616      |
| NM_024243    | Fuca1         | 1    | 1                   | FUCA1      | 2517        | 71665       |
| NM_001002268 | Gpr126        | 1    | 6                   | GPR126     | 57211       | 215798      |
| NM_019518    | Grasp         | 1    | 5                   | GRASP      | 160622      | 56149       |
| NM_178020    | Hyal3         | 1    | 1                   | HYAL3      | 8372        | 109685      |
| NM_010496    | Id2           | 1    | 1                   | ID2        | 3398        | 15902       |
| NM_011101    | Prkca         | 1    | 3                   | PRKCA      | 5578        | 18750       |
| NM_027455    | Qpct          | 1    | 1                   | QPCT       | 25797       | 70536       |
| NM_009062    | Rgs4          | 1    | 2                   | RGS4       | 5999        | 19736       |
| NM_027917    | Shroom1       | 1    | 4                   | SHROOM1    | 134549      | 71774       |
| NM_172653    | Slc39a10      | 1    | 2                   | SLC39A10   | 57181       | 227059      |
| NM_021502    | Trappc2l      | 1    | 1                   | TRAPPC2L   | 51693       | 59005       |
| NM_011657    | Tulp3         | 1    | 2                   | TULP3      | 7289        | 22158       |
| NM_030728    | 9930013L23Rik | 2    | 2                   | KIAA1199   | 57214       | 80982       |
| BC151018     | A430107O13Rik | 2    | 4                   | C7ORF58    | 79974       | 214642      |
| NM_029631    | Abhd14b       | 2    | 1                   | ABHD14B    | 84836       | 76491       |
| NM_172309    | Arntl2        | 2    | 8                   | ARNTL2     | 56938       | 272322      |
| NM_012055    | Asns          | 2    | 2                   | ASNS       | 440         | 27053       |
| NM_025651    | Aste1         | 2    | 3                   | ASTE1      | 28990       | 66595       |
| NM_178309    | Brip1         | 2    | 1                   | BRIP1      | 83990       | 237911      |
| NM_001081557 | Camta1        | 2    | 2                   | CAMTA1     | 23261       | 100072      |
| NM_013742    | Cars          | 2    | 3                   | CARS       | 833         | 27267       |
| NM_011925    | Cd97          | 2    | 1                   | CD97       | 976         | 26364       |
| NM_178347    | Cdc23         | 2    | 1                   | CDC23      | 8697        | 52563       |
| NM_026770    | Cgref1        | 2    | 1                   | CGREF1     | 10669       | 68567       |
| NM_022890    | Cldn12        | 2    | 1                   | CLDN12     | 9069        | 64945       |
| NM_007742    | Col1a1        | 2    | 2                   | COL1A1     | 1277        | 12842       |
| NM_007743    | Col1a2        | 2    | 3                   | COL1A2     | 1278        | 12843       |
| NM_024223    | Crip2         | 2    | 2                   | CRIP2      | 1397        | 68337       |
| NM_007792    | Csrp2         | 2    | 2                   | CSRP2      | 1466        | 13008       |
| NM_009999    | Cyp2b10       | 2    | 3                   | CYP2B6     | 1555        | 13088       |
| NM_007833    | Dcn           | 2    | 2                   | DCN        | 1634        | 13179       |

Sheet1

|              |           |   |   |           |        |        |
|--------------|-----------|---|---|-----------|--------|--------|
| NM_001013368 | E2f8      | 2 | 2 | E2F8      | 79733  | 108961 |
| NM_001001932 | Eea1      | 2 | 1 | EEA1      | 8411   | 216238 |
| NM_023794    | Etv5      | 2 | 6 | ETV5      | 2119   | 104156 |
| NM_183221    | Fat4      | 2 | 7 | FAT4      | 79633  | 329628 |
| NM_007992    | Fbln2     | 2 | 2 | FBLN2     | 2199   | 14115  |
| NM_008006    | Fgf2      | 2 | 7 | FGF2      | 2247   | 14173  |
| NM_175459    | Glis3     | 2 | 2 | GLIS3     | 169792 | 226075 |
| NM_054044    | Gpr124    | 2 | 2 | GPR124    | 25960  | 78560  |
| NM_175660    | Hist1h2ab | 2 | 2 | HIST1H2AE | 8335   | 319170 |
| NM_010441    | Hmga2     | 2 | 1 | HMGA2     | 8091   | 15364  |
| NM_008360    | Il18      | 2 | 2 | IL18      | 3606   | 16173  |
| NM_001122733 | Kit       | 2 | 2 | KIT       | 3815   | 16590  |
| NM_010729    | Loxl1     | 2 | 2 | LOXL1     | 4016   | 16949  |
| NM_172308    | Mthfd1l   | 2 | 1 | MTHFD1L   | 25902  | 270685 |
| NM_010751    | Mxd1      | 2 | 2 | MXD1      | 4084   | 17119  |
| NM_010924    | Nnmt      | 2 | 2 | NNMT      | 4837   | 18113  |
| NM_028994    | Pck2      | 2 | 1 | PCK2      | 5106   | 74551  |
| NM_008788    | Pcolce    | 2 | 2 | PCOLCE    | 5118   | 18542  |
| NM_001146268 | Pdgfrb    | 2 | 2 | PDGFRB    | 5159   | 18596  |
| NM_027629    | Pgm2l1    | 2 | 1 | PGM2L1    | 283209 | 70974  |
| NM_152894    | Pop1      | 2 | 1 | POP1      | 10940  | 67724  |
| NM_015784    | Postn     | 2 | 2 | POSTN     | 10631  | 50706  |
| NM_011145    | Ppard     | 2 | 2 | PPARD     | 5467   | 19015  |
| NM_026221    | Ppfibp1   | 2 | 1 | PPFIBP1   | 8496   | 67533  |
| NM_008921    | Prim1     | 2 | 1 | PRIM1     | 5557   | 19075  |
| NM_001013381 | Rsad1     | 2 | 2 | RSAD1     | 55316  | 237926 |
| NM_011352    | Sema7a    | 2 | 1 | SEMA7A    | 8482   | 20361  |
| NM_008871    | Serpine1  | 2 | 2 | SERPINE1  | 5054   | 18787  |
| NM_011340    | Serpinf1  | 2 | 2 | SERPINF1  | 5176   | 20317  |
| NM_021398    | Slc43a3   | 2 | 2 | SLC43A3   | 29015  | 58207  |
| NM_011404    | Slc7a5    | 2 | 2 | SLC7A5    | 8140   | 20539  |
| NM_011412    | Slit3     | 2 | 2 | SLIT3     | 6586   | 20564  |
| NM_001040085 | Sytl2     | 2 | 2 | SYTL2     | 54843  | 83671  |
| NM_013685    | Tcf4      | 2 | 2 | TCF4      | 6925   | 21413  |
| NM_001044384 | Timp1     | 2 | 2 | TIMP1     | 7076   | 21857  |
| NM_027154    | Tmbim1    | 2 | 2 | TMBIM1    | 64114  | 69660  |
| NM_008764    | Tnfrsf11b | 2 | 2 | TNFRSF11B | 4982   | 18383  |
| NM_027182    | Trip13    | 2 | 3 | TRIP13    | 9319   | 69716  |
| NM_029770    | Unc5b     | 2 | 2 | UNC5B     | 219699 | 107449 |
| NM_177470    | Acaa2     | 3 | 7 | ACAA2     | 10449  | 52538  |
| NM_009627    | Adm       | 3 | 2 | ADM       | 133    | 11535  |
| NM_009747    | Bdkrb2    | 3 | 1 | BDKRB2    | 624    | 12062  |
| NM_009949    | Cpt2      | 3 | 1 | CPT2      | 1376   | 12896  |
| NM_026172    | Decr1     | 3 | 1 | DECR1     | 1666   | 67460  |
| NM_026695    | Etfb      | 3 | 1 | ETFB      | 2109   | 110826 |
| NM_025794    | Etfdh     | 3 | 1 | ETFDH     | 2110   | 66841  |
| NM_008046    | Fst       | 3 | 2 | FST       | 10468  | 14313  |
| NM_029522    | Gpsm2     | 3 | 1 | GPSM2     | 29899  | 76123  |
| NM_024255    | Hsdl2     | 3 | 1 | HSDL2     | 84263  | 72479  |
| NM_053261    | Impa2     | 3 | 5 | IMPA2     | 3613   | 114663 |
| NM_153526    | Insig1    | 3 | 1 | INSIG1    | 3638   | 231070 |
| NM_146006    | Lss       | 3 | 1 | LSS       | 4047   | 16987  |

Sheet1

|           |          |   |   |          |        |           |
|-----------|----------|---|---|----------|--------|-----------|
| NM_016966 | Phgdh    | 3 | 2 | PHGDH    | 26227  | 236539    |
| NM_007408 | Plin2    | 3 | 5 | PLIN2    | 123    | 11520     |
| NM_178753 | Spin4    | 3 | 2 | SPIN4    | 139886 | 270624    |
| NM_198108 | Morn4    | 4 | 1 | MORN4    | 118812 | 226123    |
| NM_016913 | Porcn    | 4 | 2 | PORCN    | 64840  | 53627     |
| NM_020581 | Angptl4  | 5 | 5 | ANGPTL4  | 51129  | 57875     |
| NM_009760 | Bnip3    | 5 | 2 | BNIP3    | 664    | 100042570 |
| NM_013495 | Cpt1a    | 5 | 1 | CPT1A    | 1374   | 12894     |
| NM_009127 | Scd1     | 5 | 1 | SCD      | 6319   | 20249     |
| NM_020520 | Slc25a20 | 5 | 3 | SLC25A20 | 788    | 57279     |
| NM_172671 | Lgr4     | 8 | 2 | LGR4     | 55366  | 107515    |
