# Supplementary material for: Analysis of the peroxisome proliferator-activated receptor-β/δ (PPARβ/δ) cistrome reveals novel co-regulatory role of ATF4
Source: PubMed Central journal article supplement (PMC3556323; doi:10.1186/1471-2164-13-665), 2012-11-24
Supplement: 1471-2164-13-665-S5.pdf [file 1471-2164-13-665-S5.pdf]

Sheet1

Supplemental  
Table 1. Khozoe  
et al  
Primers used for  
the study

| <b>Gene Name</b> | <b>Primer Use</b> | <b>Forward Primer</b>      | <b>Reverse Primer</b>     |
|------------------|-------------------|----------------------------|---------------------------|
| ABHD1            | qPCR              | CTTAGCTCTTGGCGTTGCTC       | CAGTGTTGTTCCAGGAAGGC      |
| ADRP             | qPCR              | CCCGTATTTGAGATCCGTGT       | CAATTTGTGGCTCCAGCTTC      |
| ANGPTL4          | qPCR              | TTCTCGCCTACCAGAGAAGTTGGG   | CATCCACAGCACCTACAACAGCAC  |
| ATF4             | qPCR              | GTCCTCCAACAACAGCAAG        | CTATACCCAACAGGGCATCC      |
| CBS              | qPCR              | CGGACTCCCCACATTATCAC       | TGTTGATTCTGACCATAGGGG     |
| CES5             | qPCR              | GATGGGACCTCACATCCAAA       | CATAGAGATGGGAGGCAGGA      |
| DHDH             | qPCR              | CAGAAGTTCGGGAGATGGTT       | AAACTTCCCTCAGAGCCTCC      |
| HDHB             | qPCR              | CAGGAAGTGAACAAGCAATG       | AGCCATGGTGACAGTGTGAG      |
| HTATIP2          | qPCR              | TGATGTTGGATTCTGTTGCC       | CAGCTCTGCAGACTTGAGCA      |
| MCAM             | qPCR              | CCAAACTGGTGTGCGTCTT        | GTGGGTACTGGCTGCTTTTC      |
| MORN4            | qPCR              | TCACTTCGAGAATGGGCTTT       | AACTTGCCCTGGGAAAACCTC     |
| OSGIN1           | qPCR              | GAGTGTCCAGACAACCCAGG       | CAGGAGGTCATAGCTCGGTG      |
| PMP22            | qPCR              | AGCCGTCCAACACTGCTACT       | GAACAGGAACAGAGCCAGGA      |
| PRICKLE1         | qPCR              | CCTGACGCGGAGGACCGCAG       | ATCCAAGAGACAGCTGCCACG     |
| SDCBP2           | qPCR              | CAGTGGCTGGAGAAGAGGAC       | CCACCTTCAGATCCTCCAGA      |
| SNAI3            | qPCR              | GTGAAAACGCACTCCAGTCA       | GGATCCTGCCAACTCCTTG       |
| TGFB1            | qPCR              | ACCAGAGGAAGATCTGCGG        | ATTTGAGAGCGGAAGAGCTG      |
| TULP3            | qPCR              | CAAGCCAGACCTTCAGGAGA       | CCCTCATCTTCCTCCTTGTC      |
| ADRP             | ChIP-qPCR         | CTCGGGCCCATGTTACAGT        | CGGTGAGTGTGCTGCTGAG       |
| ANGPTL4          | ChIP-qPCR         | AAGGCACACAGGATAGGTTTGAAG   | GGTACTTCGTAGTCTCGGCTGAATG |
| MCAM             | ChIP-qPCR         | CCTGGGTTTCTGTAACCTCTGAAATC | TGCTTATGTGAACAGGGAGTGTTAC |
| MORN4            | ChIP-qPCR         | GCTTGGCTTCTGGGCGACGACTGTC  | CCACCTCTCTTTCAGATCTTTGGCC |
| OSGIN1           | ChIP-qPCR         | TGGGTACTTAGAGTGAGAGCCTGAC  | CCCTGGTCCTTATAGACTTCTCTTC |
| PRICKLE1         | ChIP-qPCR         | TCCTGGGGATCTGAACTGAG       | CAATTCCCTGAACCAAGTCG      |
| SLC43A2          | ChIP-qPCR         | GCTCATCTTTATCGCCTTGG       | AGGCAATAAATGTGGACCGA      |
| SNAI3            | ChIP-qPCR         | GCTATGACTCACAGTTACAGGCCAG  | CTGTGGCCCGCTCCATGTGCTTCTG |
| TGFB1            | ChIP-qPCR         | CTGCTCTCACTTACCAGCA        | TGACCTGTCCTATGCTCACG      |
| TULP3            | ChIP-qPCR         | GGAAGTGGAGTTACAGATGGTTGTG  | CAACCCTACTCATTTAGCACTAGCC |
